# Supplementary material for: A high-throughput and untargeted lipidomics approach reveals new mechanistic insight and the effects of salvianolic acid B on the metabolic profiles in coronary heart disease rats using ultra-performance liquid chromatography with mass spectrometry
Source: Royal Society of Chemistry journal article supplement (doi:10.1039/d0ra00049c), 2020-01-01
Supplement: d0ra00049c1.pdf [file d0ra00049c1.pdf]

**Table S1** Summary of potential lipids biomarkers of CHD and SalB therapeutic action by UPLC/MS analysis

| No. | Rt(min) | Ion Form | Chemical Formula | m/z      | Error    | Proposed Compound       | Trend in CHD Model | HMDB Code   | Geniposide Regulation | Data significance compared with CHD model |
|-----|---------|----------|------------------|----------|----------|-------------------------|--------------------|-------------|-----------------------|-------------------------------------------|
| 1   | 0.47    | M-H      | C61H112O5        | 923.8351 | -9.3174  | TG(20:0/20:4/o-18:0)    | up                 | HMDB45996   | ✓                     | ##                                        |
| 2   | 1.09    | M+H      | C46H82NO8P       | 808.5890 | 4.8498   | PC(20:4/18:1)           | low                | HMDB08433   | ✓                     | ##                                        |
| 3   | 2.17    | M+H      | C46H82NO8P       | 808.5890 | 4.8498   | PC(18:3/20:2)           | up                 | HMDB08177   | ✓                     | ##                                        |
| 4   | 2.32    | M+H      | C39H73O8P        | 701.5082 | -4.8308  | PA(18:0/18:2)           | up                 | HMDB07861   | ✓                     | ##                                        |
| 5   | 2.65    | M-H      | C23H44NO7P       | 476.2794 | 3.8052   | LysoPE(18:2/0:0)        | low                | HMDB11507   | ✓                     | #                                         |
| 6   | 2.81    | M-H      | C55H90O6         | 845.6704 | 4.5937   | TG(14:1/18:4/20:3)      | up                 | HMDB48281   |                       |                                           |
| 7   | 3.07    | M-H      | C45H91N2O6P      | 785.6510 | -4.0066  | SM(d18:0/22:1)          | low                | HMDB12092   | ✓                     | ##                                        |
| 8   | 3.48    | M-H      | C18H38NO5P       | 378.2450 | 9.57E-08 | Sphingosine-1-phosphate | low                | HMDB00277   | ✓                     | ##                                        |
| 9   | 3.66    | M-H      | C27H44NO7P       | 524.2800 | 0.0545   | PE(22:6/0:0)            | low                | HMDB0011526 | ✓                     | #                                         |
| 10  | 3.97    | M-H      | C25H44NO7P       | 500.2800 | 0.1107   | LysoPE(20:4/0:0)        | up                 | HMDB11517   | ✓                     | #                                         |
| 11  | 4.62    | M+H      | C18H39NO2        | 302.3066 | 4.1583   | Sphinganine             | up                 | HMDB00269   | ✓                     | ##                                        |
| 12  | 5.10    | M-H      | C36H73NO3        | 566.5516 | 0.0432   | Cer(d18:0/18:0)         | up                 | HMDB0011761 | ✓                     | ##                                        |
| 13  | 5.23    | M-H      | C42H76NO10P      | 784.5170 | 0.4862   | PS(18:0/18:3)           | low                | HMDB12381   |                       |                                           |
| 14  | 5.85    | M+H      | C28H54NO7P       | 548.3723 | 2.2723   | LysoPC(20:2)            | up                 | HMDB10392   |                       |                                           |
| 15  | 6.24    | M-H      | C34H64NO10P      | 676.4191 | -0.6011  | PS(14:0/14:1)           | low                | HMDB12331   | ✓                     | ##                                        |
| 16  | 6.49    | M+H      | C20H32O5         | 353.2353 | 3.3300   | Prostaglandin E2        | up                 | HMDB01220   | ✓                     | #                                         |
| 17  | 6.86    | M+H      | C20H32O2         | 327.23   | -2.4511  | Arachidonic acid        | up                 | HMDB01043   | ✓                     | ##                                        |
| 18  | 6.99    | M+H      | C42H84NO8P       | 762.5971 | -4.7685  | PC(18:0/16:0)           | up                 | HMDB08034   | ✓                     | ##                                        |
| 19  | 7.24    | M+H      | C25H52NO7P       | 510.3532 | -4.376   | LysoPC(17:0)            | up                 | HMDB12108   | ✓                     | ##                                        |
| 20  | 7.72    | M-H      | C47H88NO8P       | 824.6235 | 7.2787   | PE(22:2/20:1)           | low                | HMDB09560   | ✓                     | ##                                        |
| 21  | 7.93    | M+H      | C48H82NO8P       | 832.5871 | 2.3712   | PC(20:3/20:4)           | up                 | HMDB08410   | ✓                     | ##                                        |
| 22  | 8.23    | M+H      | C46H93N2O6P      | 801.6805 | -4.8802  | SM(d18:1/23:0)          | up                 | HMDB12105   |                       |                                           |
| 23  | 8.47    | M+H      | C58H98O6         | 891.7355 | -9.0719  | TG(15:0/22:6/18:1)      | up                 | HMDB43781   | ✓                     | #                                         |
| 24  | 8.75    | M-H      | C41H74NO7P       | 722.5122 | -1.1214  | PE(20:4/P-16:0)         | low                | HMDB09411   | ✓                     | #                                         |
| 25  | 9.11    | M+H      | C44H80NO10P      | 814.5640 | 6.1539   | PS(20:3/18:0)           | low                | HMDB12422   | ✓                     | #                                         |
| 26  | 9.68    | M+H      | C27H46O4S        | 467.3224 | 0.00161  | Cholesterol sulfate     | up                 | HMDB00653   | ✓                     | #                                         |

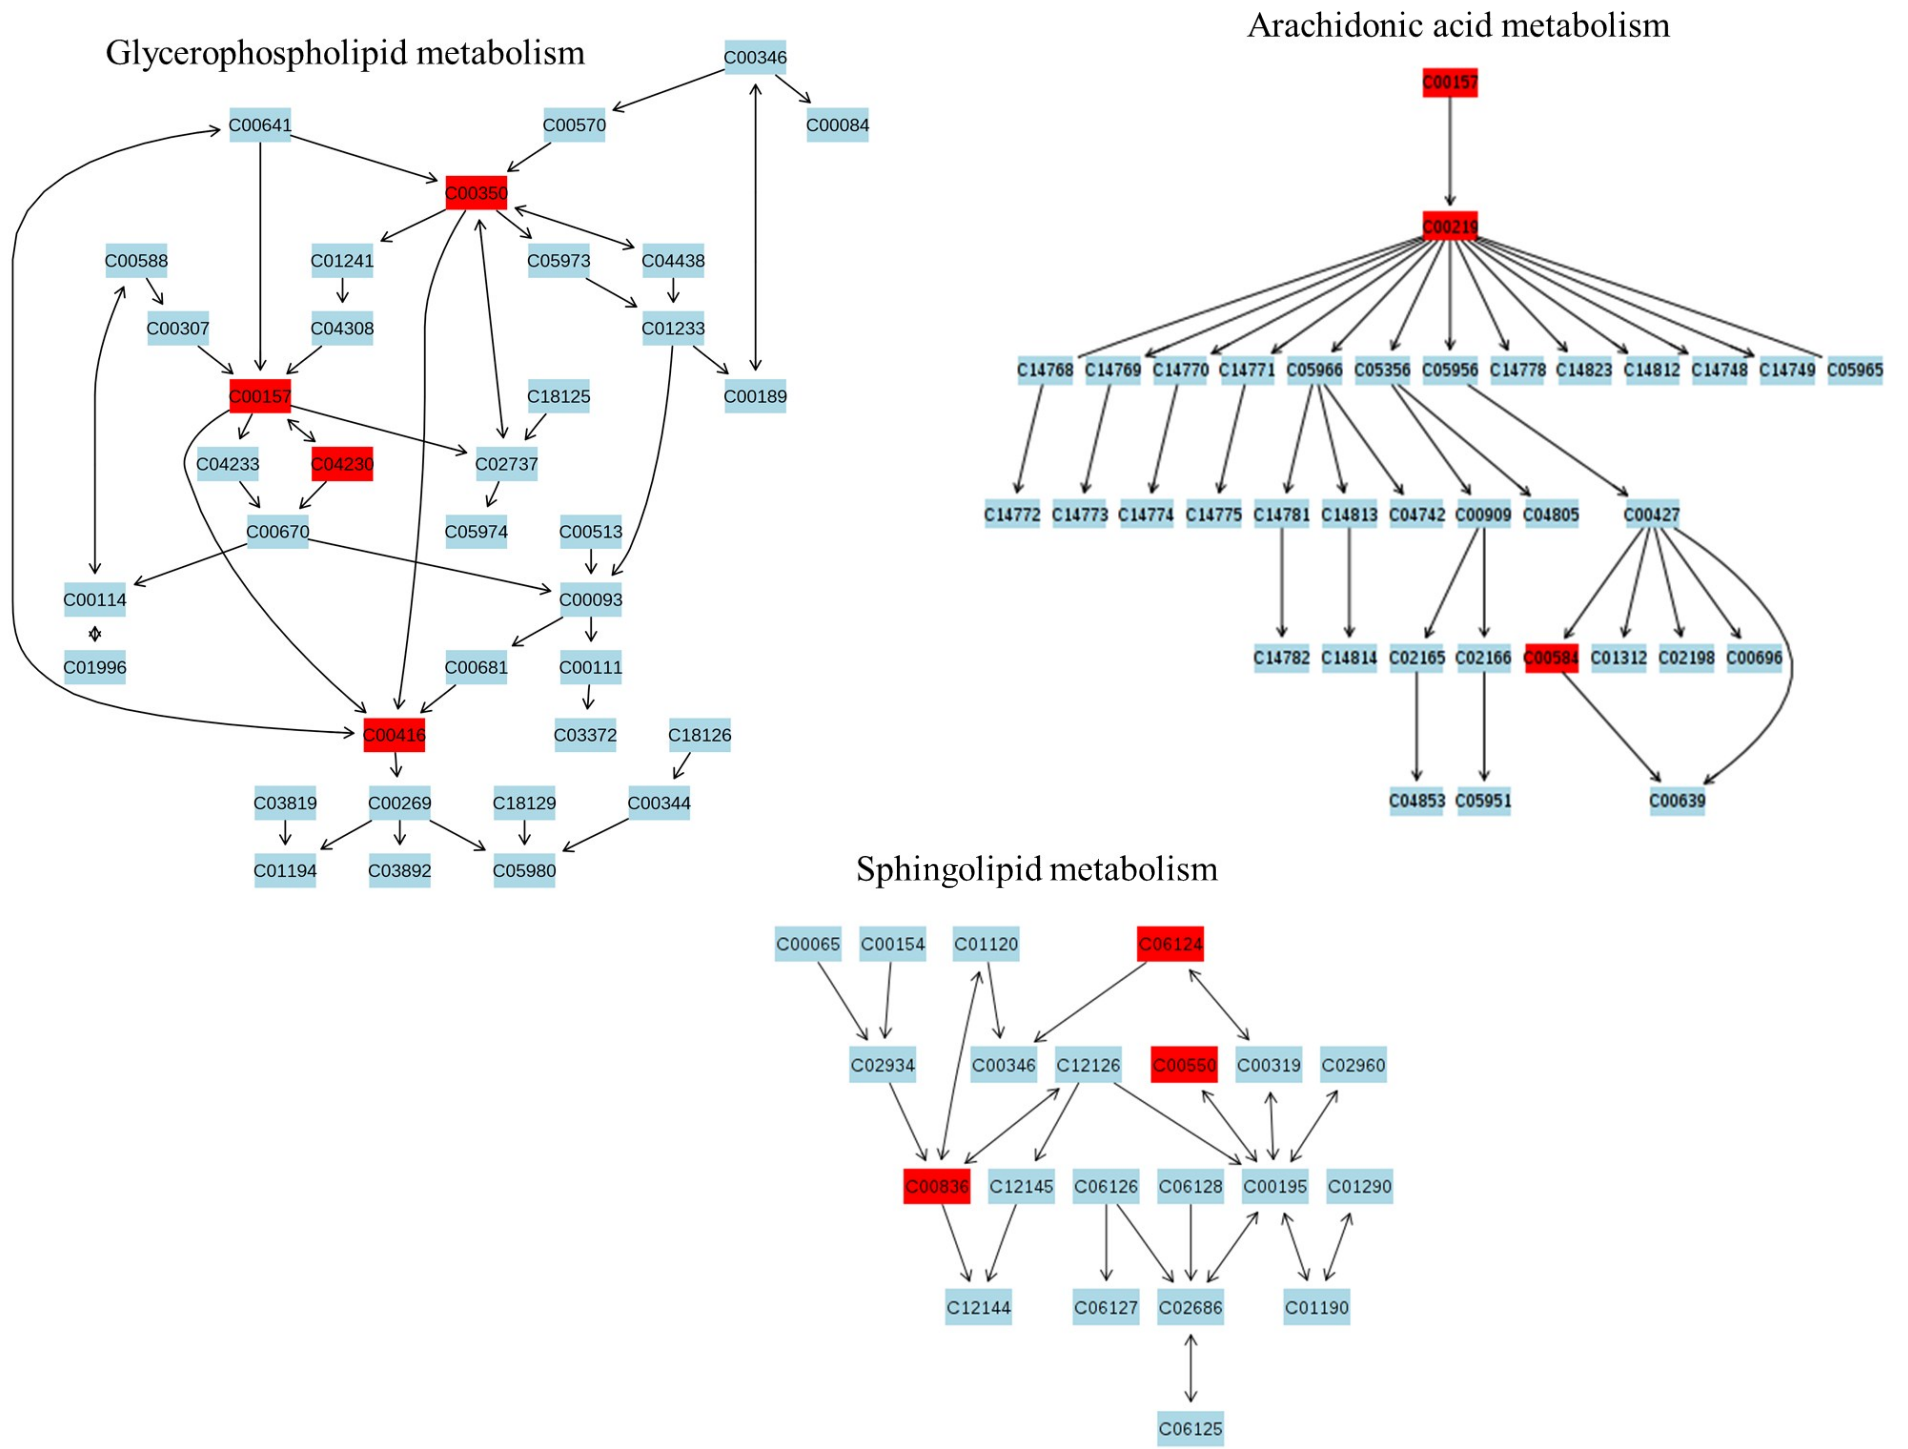

**Figure 1S** The KEGG pathway of glycerophospholipid metabolism, sphingolipid metabolism and arachidonic acid metabolism.

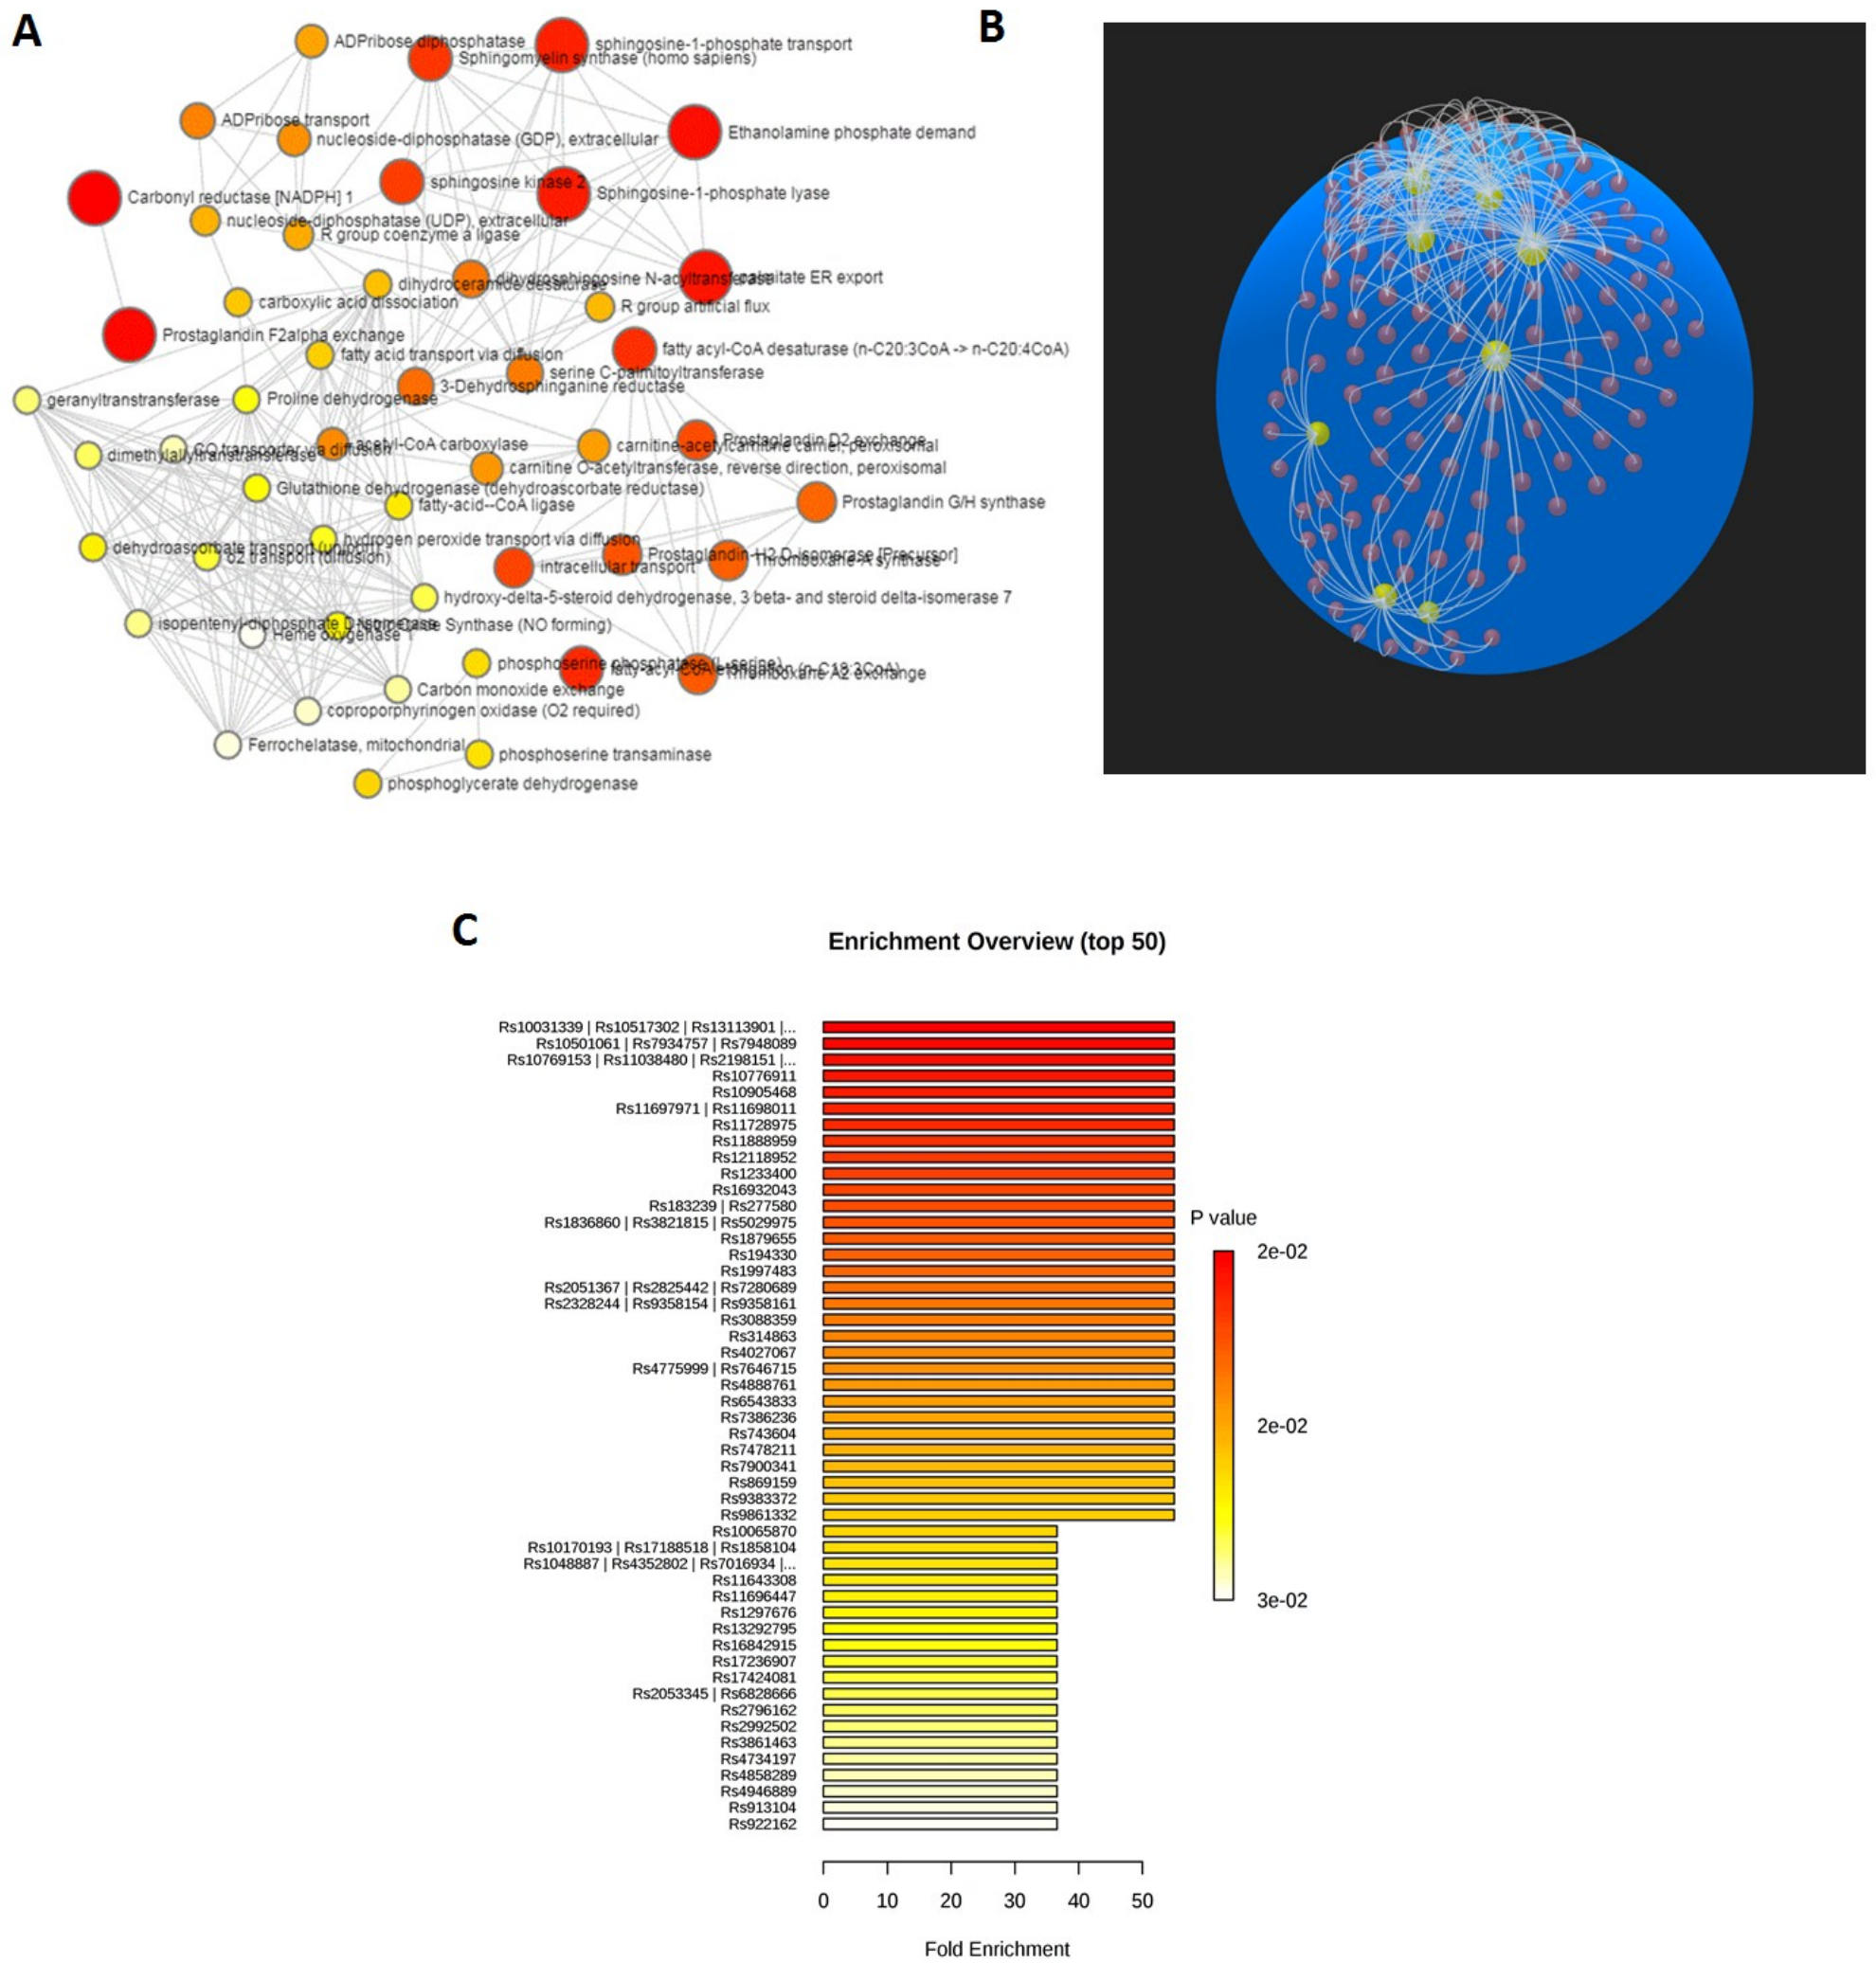

**Figure S2** The result of enrichment and network analysis of lipid metabolites. (A) the enzymes activity affects Sal B pharmacodynamic effects on CHD predicted by genome-scale network model of human metabolism. (B) the relationship between eight lipids affected by Sal B and gene, including arachidonate, phosphatidylcholine, phosphatidylethanolamine, phosphatidate, 1-Acyl-sn-glycero-3-phosphocholine, sphinganine, sphingomyelin, sphingosine 1-phosphate. (C) the result of single nucleotide polymorphisms (SNPs) loci of these detected lipid metabolites based on their associations .
